# Supplementary material for: TGF‐β‐activated kinase‐1 inhibitor LL‐Z1640‐2 reduces joint inflammation and bone destruction in mouse models of rheumatoid arthritis by inhibiting NLRP3 inflammasome, TACE, TNF‐α and RANKL expression
Source: PubMed Central journal article supplement — Clin Transl Immunology. 2022 Jan 19;11(1):e1371. doi: 10.1002/cti2.1371 (PMC8770968; doi:10.1002/cti2.1371), 2022-01-19
Supplement: CTI2-11-e1371-s001.pdf [file CTI2-11-e1371-s001.pdf]

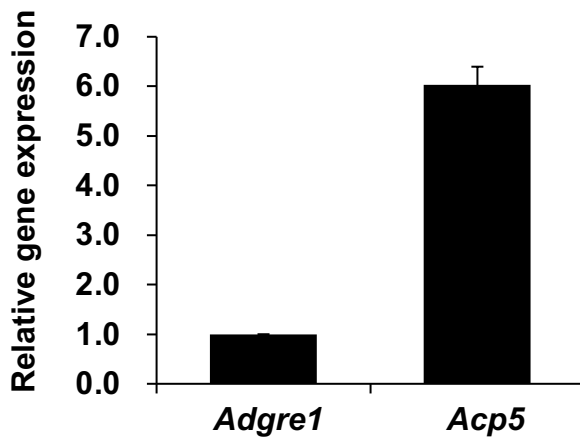

**Supplementary figure 1.** BMMs were cultured for 10 days with M-CSF (10 ng mL<sup>-1</sup>) and RANKL (50 ng mL<sup>-1</sup>) to generate OCs. After pipetting and washing, the adherent cells were subject to the assessment of the expression of *Adgre1* (F4/80) and *Acp5* (TRAP) as OCs and macrophages specific genes, respectively. Their expression (CT value) was compared. Data are expressed as mean  $\pm$  SD (n =3 independent samples).

### Supplementary figure 1

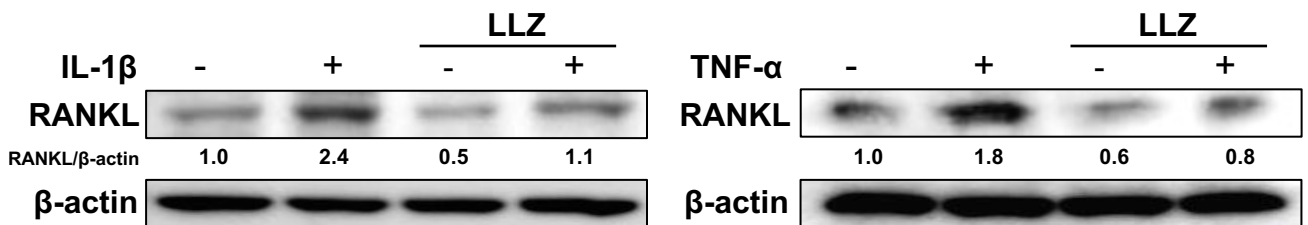

**Supplementary figure 2.** Synovial fibroblasts isolated from CIA mice were treated for 24 hours with IL-1 $\beta$  at 20 ng mL<sup>-1</sup> or TNF- $\alpha$  at 20 ng mL<sup>-1</sup> with or without LLZ at 500 nM. Protein levels of RANKL was detected by Western blotting.  $\beta$ -actin was used as a protein loading control. Relative changes of the band intensities standardized by respective loading controls are indicated.

**Supplementary figure 2**

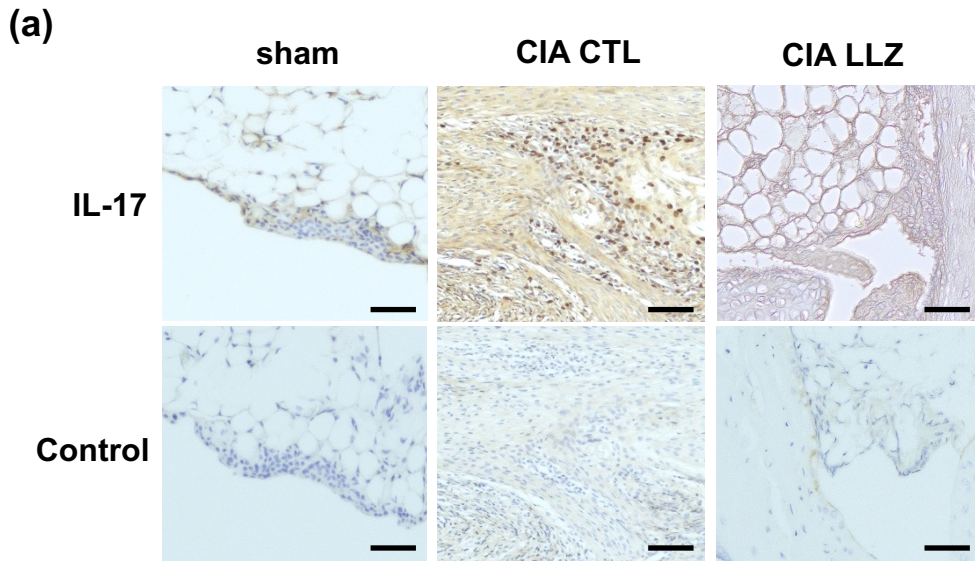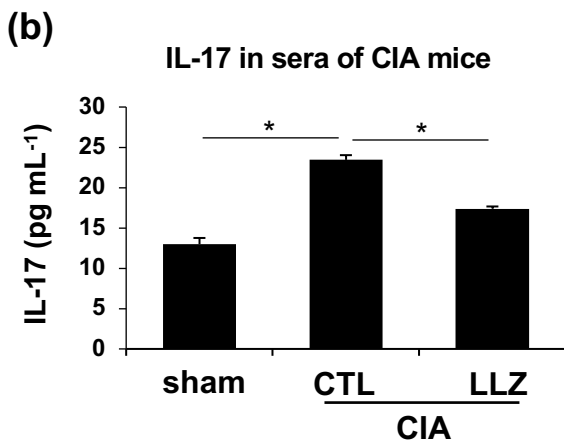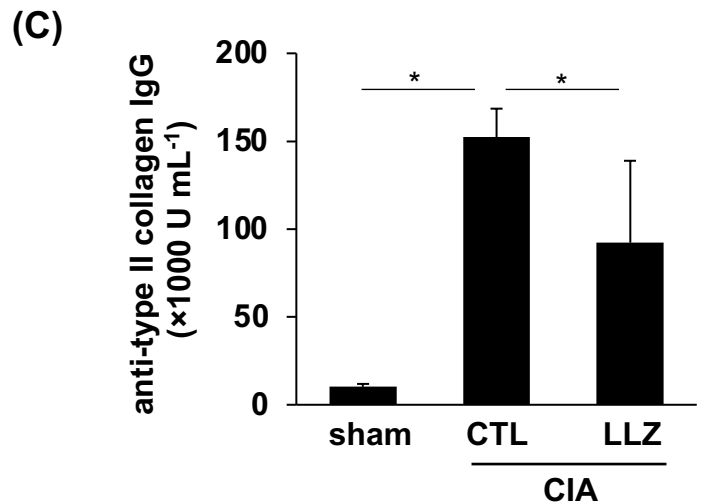

**Supplementary figure 3.** (a) Th17 cell infiltration to synovial tissues in knee joints of sham and CIA mice treated with or without LLZ. Scale bar, 100  $\mu$ m. Original magnification x200. Serum concentrations of IL-17A (b) and anti-type II collagen IgG (c) in respective mice were quantified by ELISA. Data are expressed as mean SD (n=4 for each group). \* $P < 0.05$  by one-way ANOVA with Tukey's test.

**Supplementary figure 3**

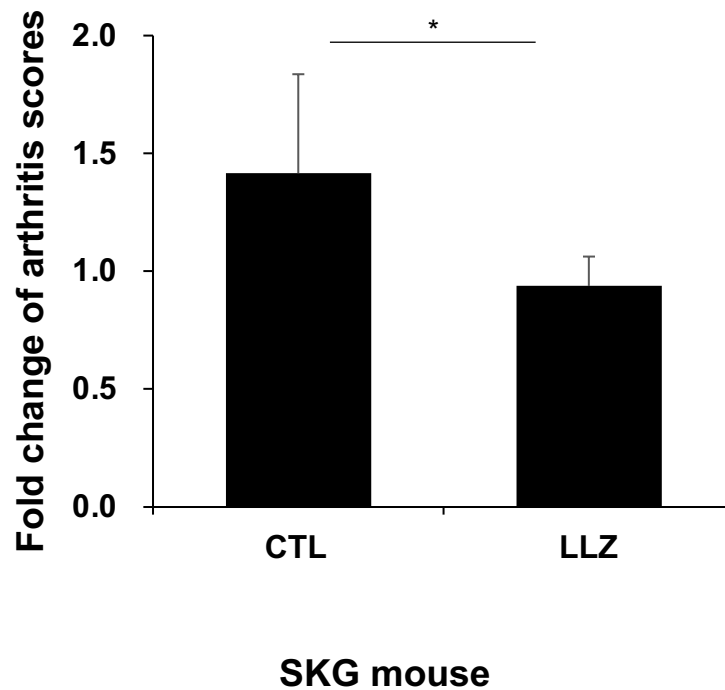

**Supplementary figure 4.** SKG mice were treated with mannan (10 mg/mouse) to induce arthritis. Two weeks later, the mice were divided into two groups (n=4 for each group). LLZ (20 mg kg<sup>-1</sup>) or PBS as a vehicle control were intraperitoneally administered every other day for additional 2 weeks. Joint swelling was monitored by inspection and arthritis score was counted at 2 and 4 weeks as in Methods. Fold changes of the arthritis scores at 4 weeks from those at 2 weeks are indicated (mean ± SD). \**P* < 0.05 by Student's *t*-test.

**Supplementary figure 4**

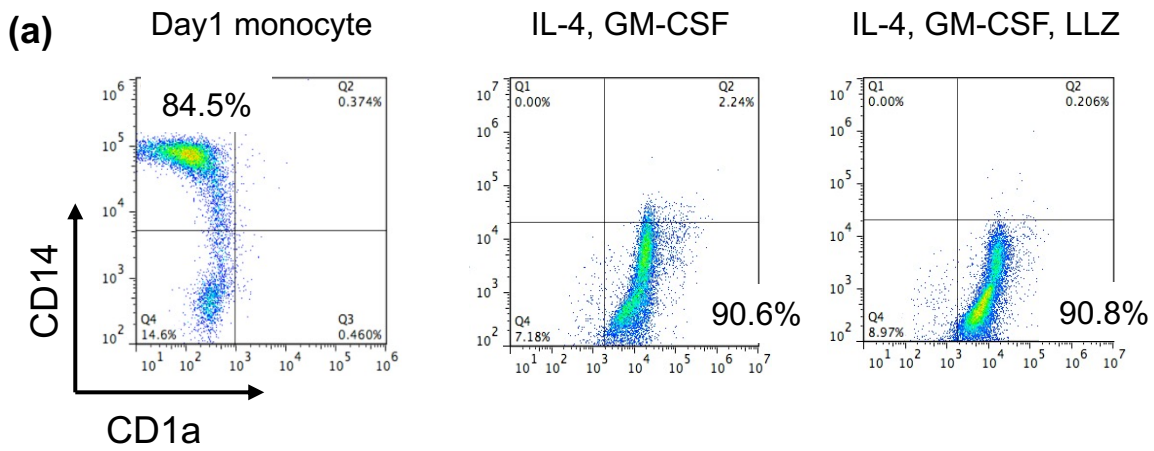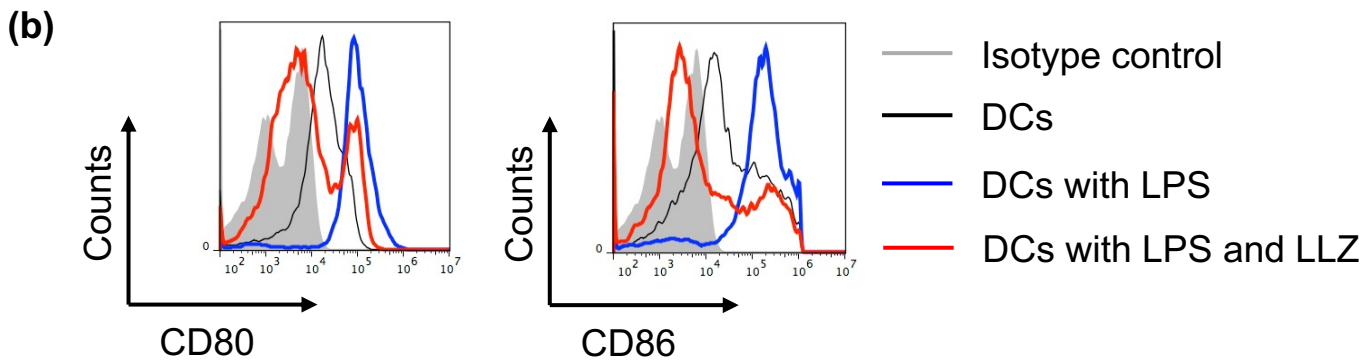

**Supplementary figure 5. (a)** Immature DC were differentiated from CD14<sup>+</sup> cells from healthy donors in the presence of IL-4 (50 ng mL<sup>-1</sup>) and GM-CSF (25 ng mL<sup>-1</sup>) in combination with or without LLZ (5 μM). Immature DCs were identified by a CD14<sup>-</sup>, CD1a<sup>+</sup> fraction. **(b)** Immature DCs were further treated with LPS (100 ng mL<sup>-1</sup>) in the presence or absence of LLZ (5 μM) for 24 hours. The expression of CD80 and CD86 was analyzed by flow cytometry.

**Supplementary figure 5**
